# Supplementary material for: Microprocessor-dependent processing of splice site overlapping microRNA exons does not result in changes in alternative splicing
Source: PubMed Central journal article supplement — RNA. 2018 Sep;24(9):1158–71. doi: 10.1261/rna.063438.117 (PMC6097652; doi:10.1261/rna.063438.117), 2018-09
Supplement: supp_063438.117_Supplemental_Fig_S1.pdf [file supp_063438.117_Supplemental_Fig_S1.pdf]

**A**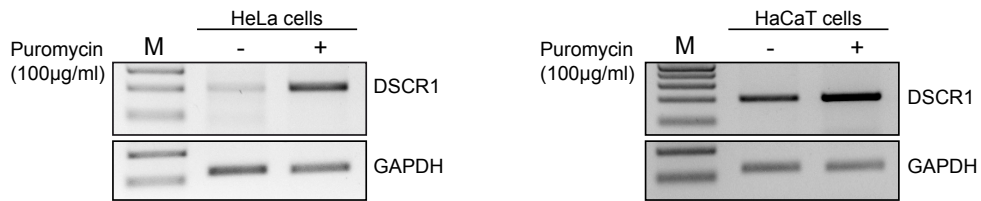**B**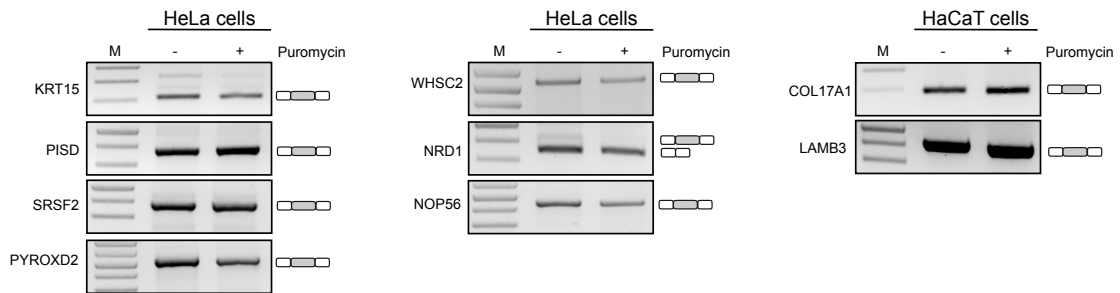**C**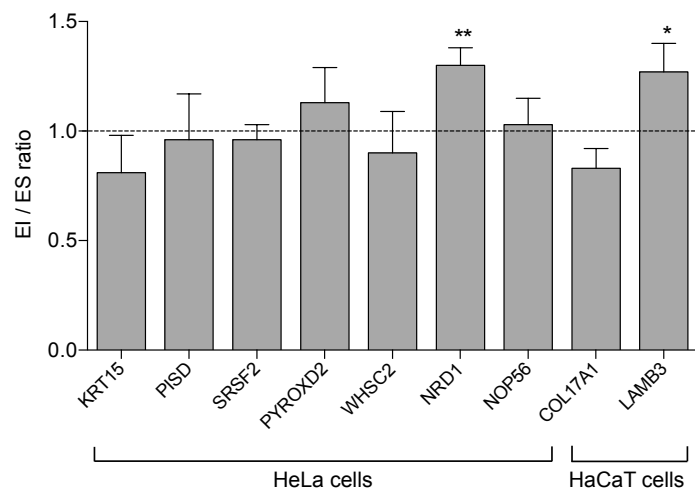**Supplemental Figure S1. SO-miRNA exons are not NMD targets.**

Endpoint RT-PCR analysis of **(A)** *DSCR1* and *GAPDH* (used as loading control) mRNAs and **(B)** SO-miRNA transcripts from HeLa and HaCaT cells before (-) and after (+) treatment with the nonsense-mediated decay suppressor puromycin (100 $\mu$ g/ml). Primers are as in Figure 1B. Band identity is depicted on the right. M, marker.

**(C)** Graph showing EI/ES ratio in HeLa and HaCaT cells treated with puromycin. Error bars show SD (three independent experiments). *p* values were calculated using two-way ANOVA test (\**p*<0.05; \*\**p*<0.01).
