# Supplementary material for: Microprocessor-dependent processing of splice site overlapping microRNA exons does not result in changes in alternative splicing
Source: PubMed Central journal article supplement — RNA. 2018 Sep;24(9):1158–71. doi: 10.1261/rna.063438.117 (PMC6097652; doi:10.1261/rna.063438.117), 2018-09
Supplement: supp_063438.117_Supplemental_Fig_S3.pdf [file supp_063438.117_Supplemental_Fig_S3.pdf]

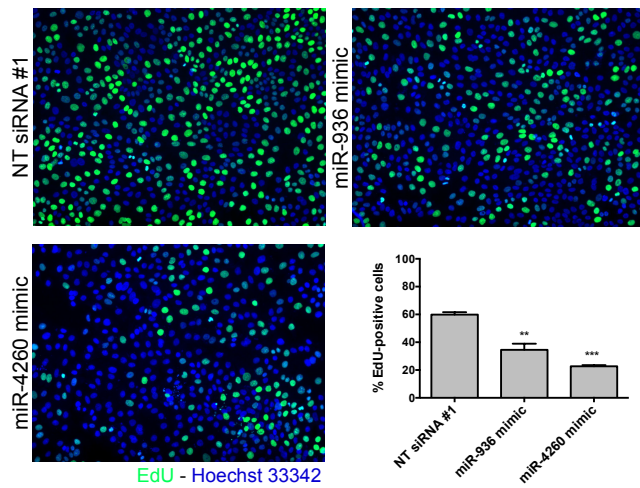

**Supplemental Figure S3. Inhibitory effect of miR-936 and miR-4260 mimics on HaCaT cells.**

EdU incorporation assay in HaCaT cells treated with the NT siRNA #1 (control), miR-936 or miR-4260 mimics. Results are representative images from three independent experiments. The percentage of EdU-positive cells was quantified and is shown as mean  $\pm$  SD.  $p$  values were calculated using one-way ANOVA test (\*\* $p < 0.01$ ; \*\*\* $p < 0.001$ ), compared with the NT siRNA #1 value, accordingly.
