# Supplementary material for: Microprocessor-dependent processing of splice site overlapping microRNA exons does not result in changes in alternative splicing
Source: PubMed Central journal article supplement — RNA. 2018 Sep;24(9):1158–71. doi: 10.1261/rna.063438.117 (PMC6097652; doi:10.1261/rna.063438.117), 2018-09
Supplement: supp_063438.117_Supplemental_Fig_S5.pdf [file supp_063438.117_Supplemental_Fig_S5.pdf]

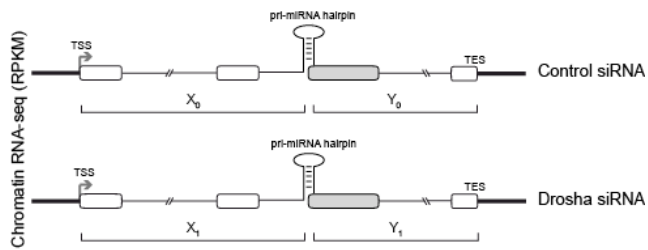

$$\text{Fold increase Drosha siRNA} = \frac{\text{mean } Y_1 / \text{mean } X_1}{\text{mean } Y_0 / \text{mean } X_0}$$

### Supplemental Figure S5. Fold increase of Drosha siRNA-treated cells.

Analysis of miRNA-containing genes with length  $\geq 2$  kb and gene-body RPKM  $\geq 1$  resulting from the online available chromatin RNA-seq data of HeLa cells treated with a control siRNA and Drosha siRNA (Dhir et al. 2015). For each gene, average number of reads (normalized to total sequencing depth) spanning from the TSS of the miRNA-containing gene to the start of the pri-miRNA hairpin (mean  $X_0$  and mean  $X_1$ ) and from the end of the pri-miRNA hairpin to the TES (mean  $Y_0$  and mean  $Y_1$ ) in the control siRNA and Drosha siRNA treated cells were estimated. The ratio between reads mapping downstream and upstream the pri-miRNA hairpin was calculated (mean  $Y_0$ /mean  $X_0$  and mean  $Y_1$ /mean  $X_1$ ). Then the fold increase of Drosha siRNA-treated cells was calculated as the average number of Drosha siRNA reads over the average number of control siRNA reads, as described in the formula (see also Materials and methods).
