# Supplementary material for: Microprocessor-dependent processing of splice site overlapping microRNA exons does not result in changes in alternative splicing
Source: PubMed Central journal article supplement — RNA. 2018 Sep;24(9):1158–71. doi: 10.1261/rna.063438.117 (PMC6097652; doi:10.1261/rna.063438.117), 2018-09
Supplement: supp_063438.117_Supplemental_Fig_S6.pdf [file supp_063438.117_Supplemental_Fig_S6.pdf]

KRT15\_EI

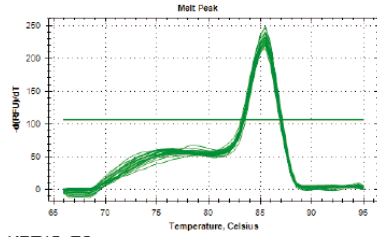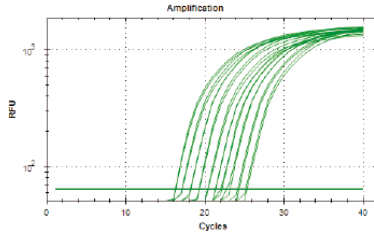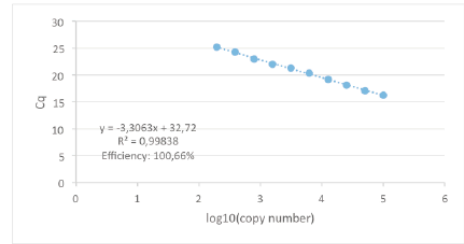

KRT15\_ES

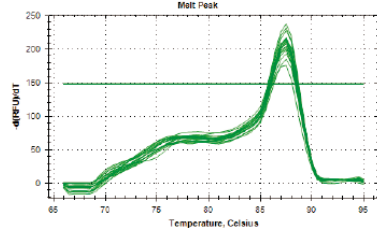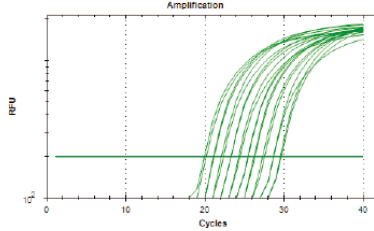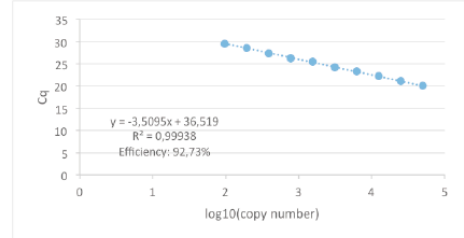

PISD\_EI

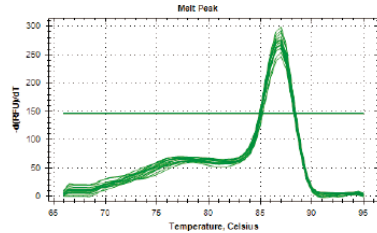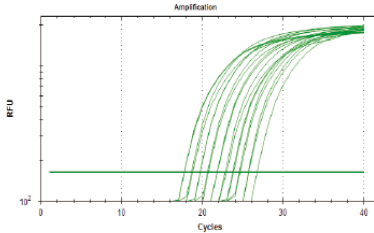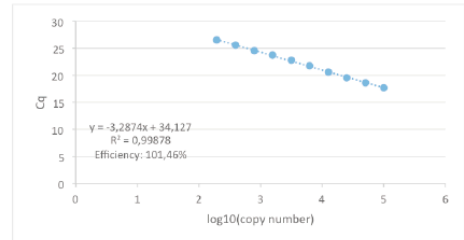

PISD\_ES

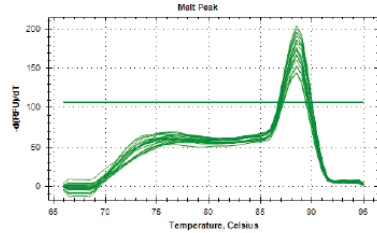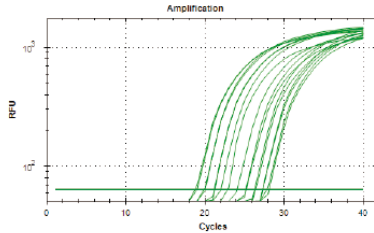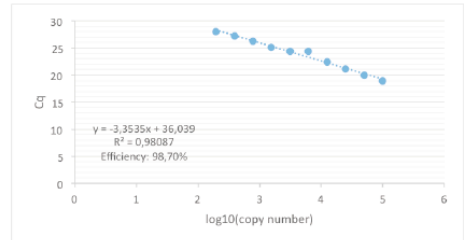

SRSF2\_EI

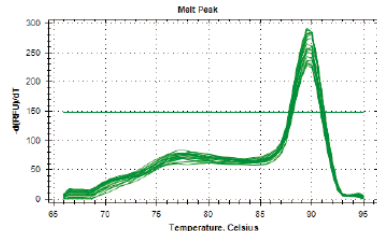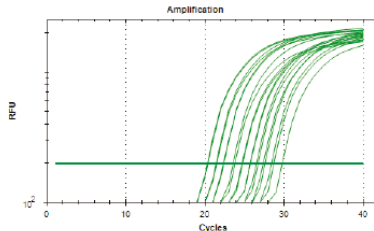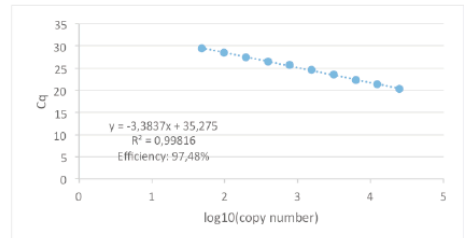

SRSF2\_ES

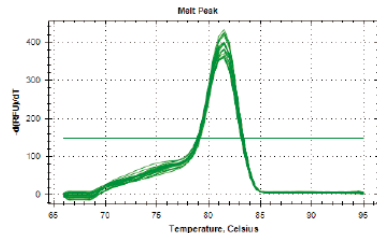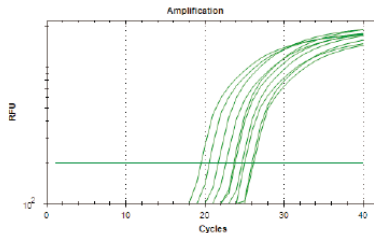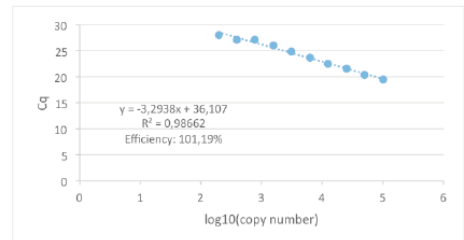

PYROXD2\_EI

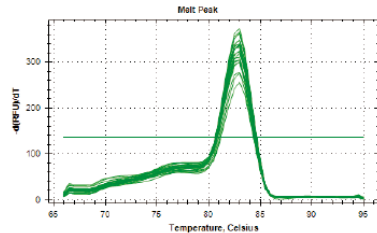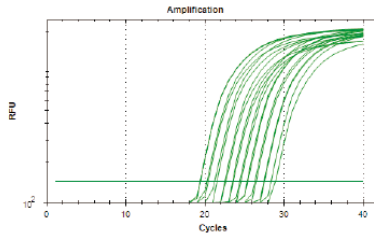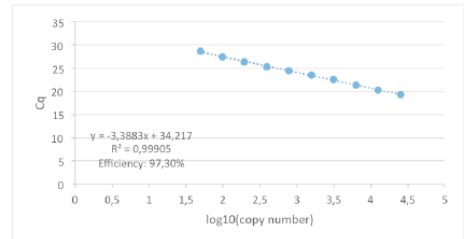

PYROXD2\_ES

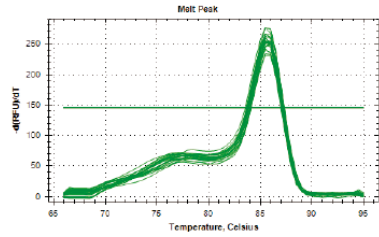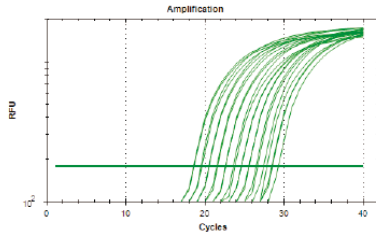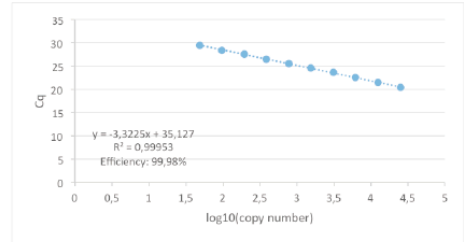

WHSC2\_EI

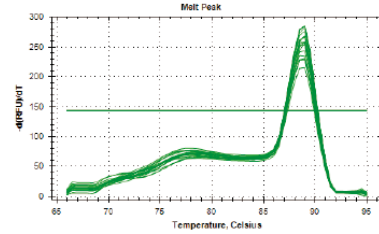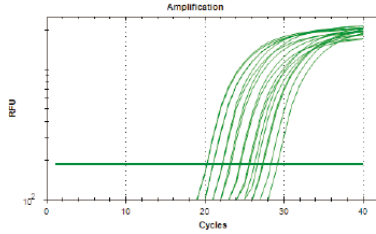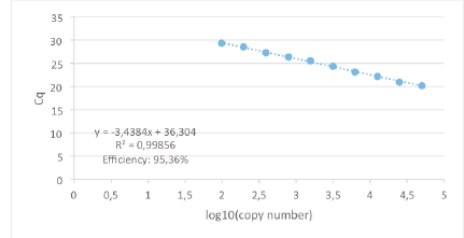

WHSC2\_ES

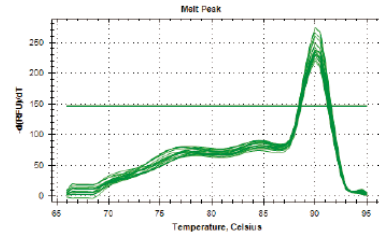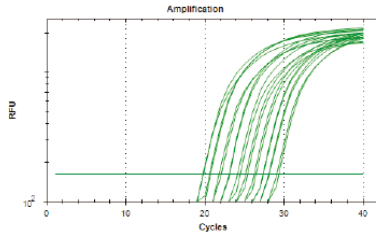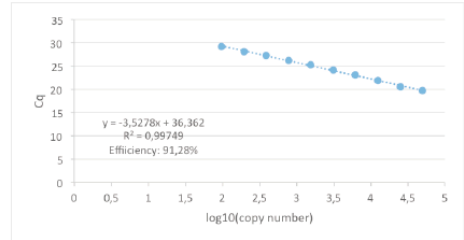

NRD1\_EI

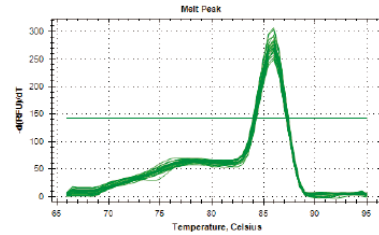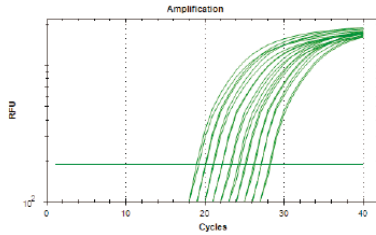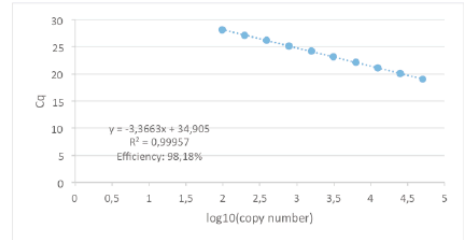

NRD1\_ES

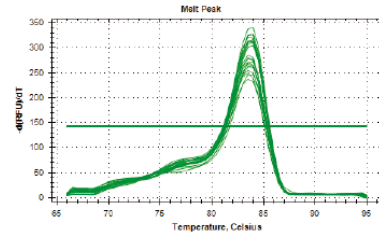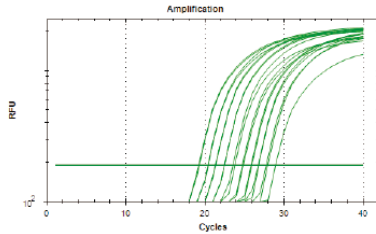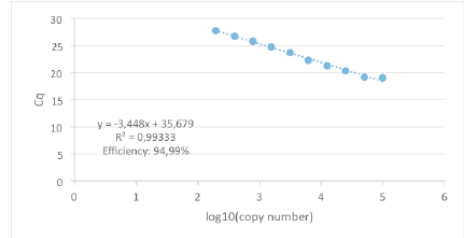

NOP56\_EI

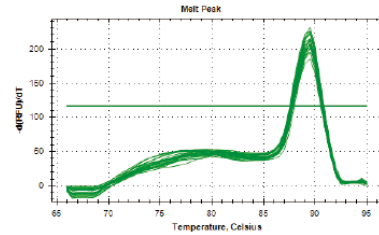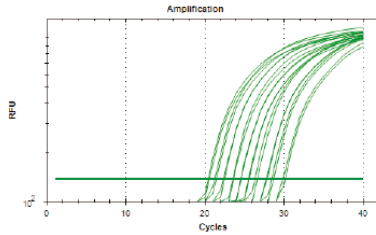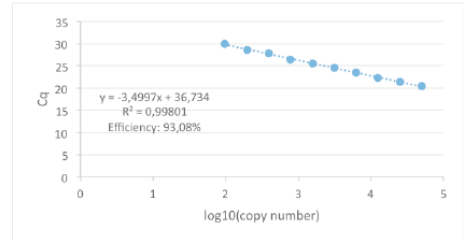

NOP56\_ES

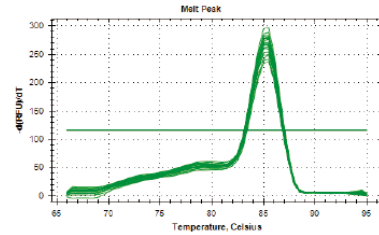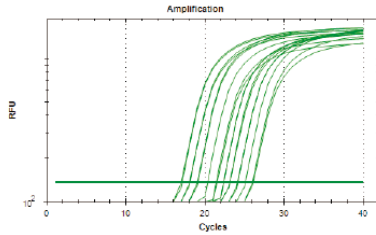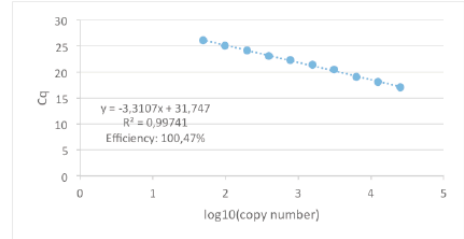

COL17A1\_EI

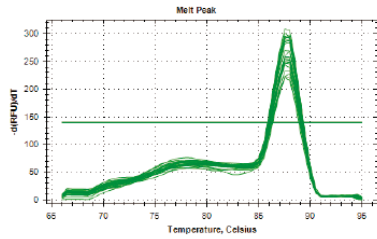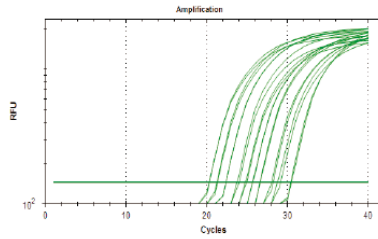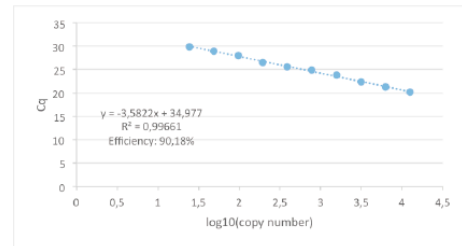

COL17A1\_ES

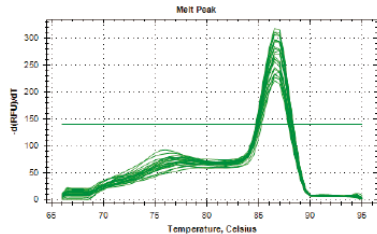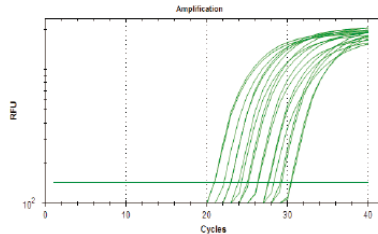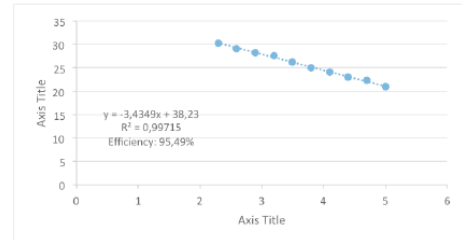

LAMB3\_EI

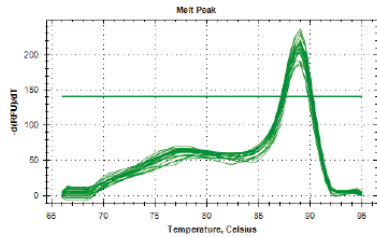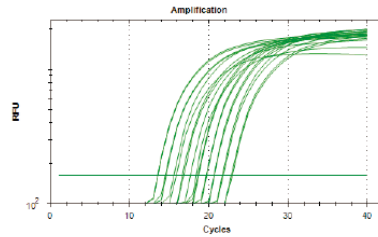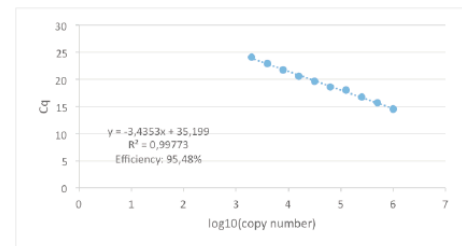

LAMB3\_ES

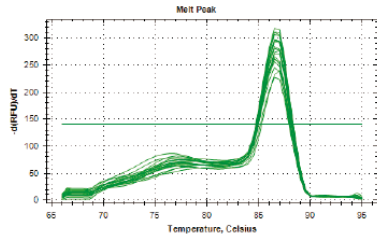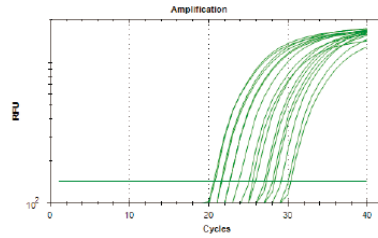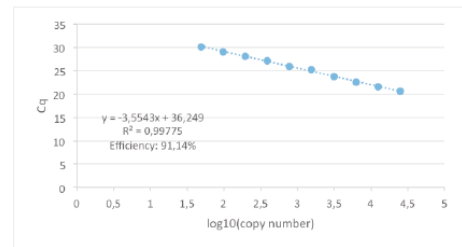

### Supplemental Figure S6. Amplification efficiency determination via standard curve analysis.

The amplification efficiency of the qRT-PCR for each primer set used in Figure 1C was determined by analyzing serially diluted cDNAs. For each set of primers melt peak curves, amplification traces and corresponding calibration curves were shown and slope and amplification efficiency were calculated. A single peak in the melt peak curves indicates that the qRT-PCR reactions are specific and a single product is amplified. Slope of calibration curves comprised between -3.1 and -3.6,  $R^2$  values that demonstrated a good linear relationship between  $C_q$  values and the cDNA concentration and amplification efficiency comprised between 90% and 110% for each set of primers are shown in the standard curves and are indicative of a suitable condition for qRT-PCR.
