# Supplementary material for: Microprocessor-dependent processing of splice site overlapping microRNA exons does not result in changes in alternative splicing
Source: PubMed Central journal article supplement — RNA. 2018 Sep;24(9):1158–71. doi: 10.1261/rna.063438.117 (PMC6097652; doi:10.1261/rna.063438.117), 2018-09
Supplement: supp_063438.117_Supplemental_Fig_S7.pdf [file supp_063438.117_Supplemental_Fig_S7.pdf]

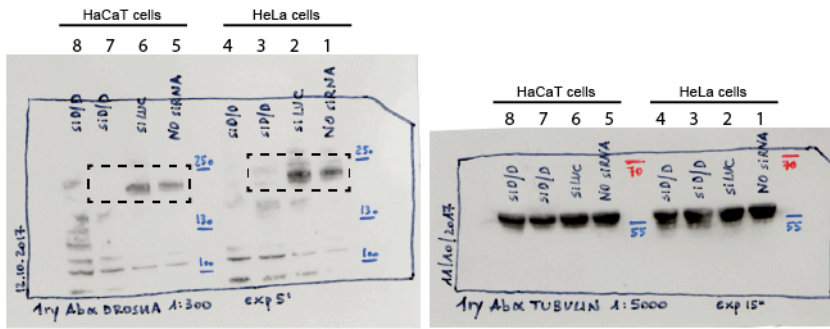

Drosha, Tubulin  
Figure 1A, lanes 1-3 (HeLa cells), 5-7 (HaCaT cells)

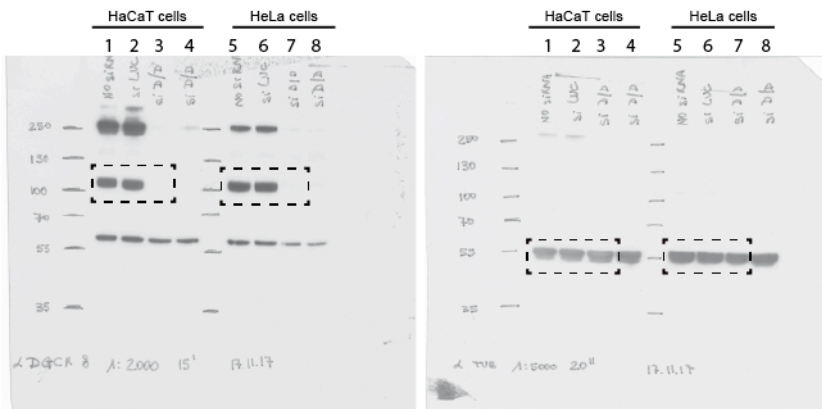

DGCR8, Tubulin  
Figure 1A, lanes 1-3 (HeLa cells), 5-7 (HaCaT cells)

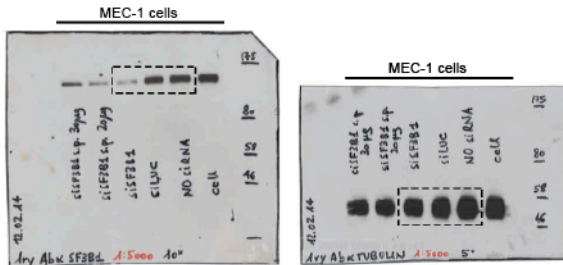

SF3b1, Tubulin  
Supplementary Figure S2A, lanes 2-4 (MEC-1 cells)

## Supplemental Figure S7. Uncropped images for western blot gels.

Broken box marks the borders of the final cropped images.
