# Supplementary material for: Microprocessor-dependent processing of splice site overlapping microRNA exons does not result in changes in alternative splicing
Source: PubMed Central journal article supplement — RNA. 2018 Sep;24(9):1158–71. doi: 10.1261/rna.063438.117 (PMC6097652; doi:10.1261/rna.063438.117), 2018-09
Supplement: supp_063438.117_Supplemental_Table_S1.pdf [file supp_063438.117_Supplemental_Table_S1.pdf]

**Primers used for quantitative real-time PCR**

| Primer              | Sequence                         |
|---------------------|----------------------------------|
| AMH ex1 dir         | 5'-GTCTGCAACACCGGTGACAG-3'       |
| AMH ex5 rev         | 5'-GGTCCGACAGGTTGACTAGG-3'       |
| AMH int1 rev        | 5'-CCTGATCTTCCCTAGGAGGA-3'       |
| AMH int4 dir        | 5'-CTCAACTCCTCCAATTGCGG-3'       |
| ASH1L ex20 dir      | 5'-CAAGTGAGGCAGACAGCAGT-3'       |
| ASH1L ex22 rev      | 5'-CCTGACGAAGCAGCAAGTCA-3'       |
| ASH1L int20 rev     | 5'-TGAATATGGTCACCGTGTTC-3'       |
| ASH1L int21 dir     | 5'-GAATGTAGTAATCCAGCCC-3'        |
| COL17A1 ex26 dir    | 5'-GTGACAAAAGGACCAATGGGAC-3'     |
| COL17A1 ex28 dir    | 5'-CGAGCCTGGCATGAGAGGTTTGCCT-3'  |
| COL17A1 ex29 rev    | 5'-CTCTTGGGCGCTTGGTGCCG-3'       |
| COL17A1 ex30-28 rev | 5'-GACCTTGTTCACCCATTGCTCCTT-3'   |
| COL17A1 ex31 rev    | 5'-CCTGAGGTCCTGGGGTCTGTGAGAC-3'  |
| FNBP4 dir           | 5'-GAGATGCTGGCTGGCTGATA-3'       |
| FNBP4 rev           | 5'-GCCTTGGAGGAAGGAGATGG-3'       |
| GAPDH dir           | 5'-GAAGGTGAAGGTCGGAGTC-3'        |
| GAPDH rev           | 5'-GAAGATGGTATGGGATTTTC-3'       |
| INVOLUCRIN dir      | 5'-GAAGCACCAAAAGGGAGAAGTATTGC-3' |
| INVOLUCRIN rev      | 5'-CCACTGCACCTCCTGCTTCT-3'       |
| KRT15 ex1 dir       | 5'-AGCCCAGAATGCGACTACAG-3'       |
| KRT15 ex2 rev       | 5'-TTGAGCCTGAAGTCGTCCGC-3'       |
| KRT15 ex1-3 dir     | 5'-CTCCGGGACAAGGTATGAGAATGA-3'   |
| KRT15 ex3 rev       | 5'-CTCTTCGTGGTCTTCTTCAGGTA-3'    |
| LAMB3 ex15 dir      | 5'-TGAGGCTGGAGATGTCTTCGTTGC-3'   |
| LAMB3 ex16-1 rev    | 5'-GCCACAGGCTGTGCCATTGTCTTG-3'   |
| LAMB3 ex14-16 dir   | 5'-CTGATCCTTCAGCTCTGTGGCAAC-3'   |
| LAMB3 ex16-2 rev    | 5'-CGCTGGAGCTGGGCATTTGAAGC-3'    |
| LAMB3 ex14 dir      | 5'-GTTGTCCCTTCCGAGAGACCTGGAG-3'  |
| LAMB3 int14 rev     | 5'-TGTGGCGAGAAGCATGAGGA-3'       |
| LAMB3 int15 dir     | 5'-TGGTTGTGCATGGAGATGTCTGGCTG-3' |
| NOP56 5UTR dir      | 5'-GAGCGCGCTAGCCGCATTGC-3'       |
| NOP56 ex2 rev       | 5'-CTGCGGCTGCAGCAGACTGATCTC-3'   |
| NOP56 5UTR-ex3 dir  | 5'-GGCGCCATGGTGGAGGAGTC-3'       |
| NOP56 ex3 rev       | 5'-CGGCGTTGGCATTTCCTCAAG-3'      |
| NOP56 ex5 rev       | 5'-TCACCAGATTGTGGAAGTGC-3'       |
| NOP56 int1 rev      | 5'-GCCCGCAACCACTCCTCAC-3'        |
| NOP56 int4 dir      | 5'-TATTCTGTATCCTGGACA-3'         |
| NRD1 ex2 dir        | 5'-GATGACGATGAAGAGGGTTTTGAT-3'   |
| NRD1 ex4 dir        | 5'-GTCTGCACCTGTTACAGCATT-3'      |
| NRD1 ex5 rev        | 5'-TGTGCTCCAAAAGTGTGCC-3'        |
| NRD1 ex2-5 dir      | 5'-ACTGAAAAACAGTCTGCAGCGGCT-3'   |
| NRD1 ex6 rev        | 5'-CTACCCCATGCTTCTTCAG-3'        |
| NRD1 ex6 rev        | 5'-CTTGAAGTACTTCTCTGGACATC-3'    |
| NRD1 int2 rev       | 5'-TAGAAGAAAAACAGACATGACTCGC-3'  |
| NRD1 int5 dir       | 5'-GTTGTGTGACTTTGTGTTCTTTCC-3'   |
| PISD ex3 dir        | 5'-CAACCTCAGCGAGTTCTTCC-3'       |
| PISD ex4 rev        | 5'-ACCTGCTCCACCTCACAGTT-3'       |
| PISD ex3 dir        | 5'-TGTACATCTGGACGTTTGGG-3'       |
| PISD ex5-3 rev      | 5'-CACACGACGCGGCACGCTGTGCAG-3'   |
| PYROXD2 ex7 dir     | 5'-CAGCTTCCCCGATATTATGA-3'       |
| PYROXD2 ex8 rev     | 5'-ACTTGTGCATGGCTCCAATCA-3'      |
| PYROXD2 ex6 dir     | 5'-AAGGATGAGGTCGCTCTCCAC-3'      |
| PYROXD2 ex9-7 rev   | 5'-AGCAGCACATACCTTGGTAATGGG-3'   |
| RPL13A dir          | 5'-CTCAAGGTCGTGCGTCTGAA-3'       |
| RPL13A rev          | 5'-TGGCTGTCACTGCCTGGTACT-3'      |
| RPLP0 dir           | 5'-CAGATTGGCTACCAACTGTT-3'       |
| RPLP0 rev           | 5'-GGGAAGGTGTAATCCGCTCTCC-3'     |
| SRSF2 ex1-2 dir     | 5'-CGCCGGAGCCGACGCCCTAG-3'       |
| SRSF2 ex2 rev       | 5'-CGAGGACTTGGACTTGGACC-3'       |
| SRSF2 ex1-3UTR dir  | 5'-AGCCGCAGATGTATCGGCAA-3'       |
| SRSF2 3UTR rev      | 5'-AACAGCAACAAAATGGCACA-3'       |
| TBP dir             | 5'-TCAAACCCAGAATTGTTCTCTTAT-3'   |
| TBP rev             | 5'-CCTGAATCCCTTTAGAATAGGGTAGA-3' |
| WHSC2 ex4 dir       | 5'-CTGCTGCGGAAGATGGACACCACC-3'   |
| WHSC2 ex5 rev       | 5'-CTTCACACCTCGTTCTTCC-3'        |
| WHSC2 ex3 dir       | 5'-CACTCCCCCGGTGAAGCATT-3'       |
| WHSC2 ex6-4 rev     | 5'-GATGTCCAGCAGTGGTGGTGTCCA-3'   |
| XIST dir            | 5'-CCACCACACGTCAGCTCTTC-3'       |
| XIST rev            | 5'-CAGGTGGGAAGGCTGACTTC-3'       |

**Primers used for semi-quantitative RT-PCR**

| Primer         | Sequence                           |
|----------------|------------------------------------|
| DUSP11 ex5 dir | 5'-GATTTGCCAGAACTGTTCCCTTA-3'      |
| DUSP11 ex7 rev | 5'-TCTGAAGGTCTTCAATGTAGTTTTGT-3'   |
| alpha 2-3 dir  | 5'-CAACTTCAAGCTCCTAAGCCACTGC-3'    |
| pFAN 904 rev   | 5'-ATCAGCATTCTCTGAAGTACATCAAC-3'   |
| DROSHA dir     | 5'-CATGTCACAGAATGTCGTTCCA-3'       |
| DROSHA rev     | 5'-GGTGAAGCAGCCTCAGATTT-3'         |
| DSCR1 dir      | 5'-GCACCAGCTCAAGAAGGAACC-3'        |
| DSCR1 rev      | 5'-GGGACTCAAATTTGGCCCTGG-3'        |
| pY7 ex2 dir    | 5'-TACAAGCTTGTGCGAGGAGACATC-3'     |
| KRT15 ex3 rev  | 5'-GTCAGCTCATCCAGGACTCG-3'         |
| PISD ex3 dir   | 5'-CAACCTCAGCGAGTTCTTCC-3'         |
| pCl rev        | 5'-GTATCTTATCATGTCTGCTCG-3'        |
| RBM5 ex15 dir  | 5'-CGGCTGTAGTGTCCAGAGT-3'          |
| RBM5 ex17 rev  | 5'-TTGCGAGTTGGGGTCATAAT-3'         |
| CF ex1 248 dir | 5'-AGACCATGCAGAGGTCGCTCTGG-3'      |
| CF ex3 292 rev | 5'-CATCGCCGAAGGGCATTAATGAGTTAGG-3' |

**TaqMan miRNA probes used for quantitative miRNA analysis**

| TaqMan probes | Assay ID   | Mature miRNA sequence                   |
|---------------|------------|-----------------------------------------|
| miR-21        | 002438     | CAACACCAGUCG AUGGGCUGU                  |
| miR-26b       | 000407     | UUCAAGUAAUUCAGGAUAGGU                   |
| miR-98        | 000577     | UGAGGUAGUAAUGUUAUUGUU                   |
| miR-148a      | 000470     | UCAGUGCAGUACAGAACUUUGU                  |
| miR-155       | 002287     | CUCCUACAUUUAGCAUUUACA                   |
| miR-330       | 002230     | UCUCUGGGCCUGUGUCUUAGGC                  |
| miR-483       | 002339     | UCACUCCUCUCCUCCGUCUU                    |
| miR-936       | 002179     | ACAGUAGAGGGAGGAUUCGCAG                  |
| miR-3655      | 462030_mat | GCUUGUCGUCGCGGUGUUGUCU                  |
| miR-4260      | 244117_mat | CUUGGGGCAUGGAGUCCCA                     |
| miR-5088      | 466458_mat | UCCCUUUCUCCUGGGCCUCA                    |
| miR-6510      | 477465_mat | CAGCAGGGGAGAGAGAGAGGUC                  |
| miR-7109      | 466424_mat | CUUGGGGAGGAGACCCUUCU                    |
| RNU6B         | 001093     | CGCAAGGATGACACGAAATCGTGAAGCGTTCCATATTTT |

**Supplemental Table S1. Sequences of primers used for quantitative RT-PCR and semi-quantitative RT-PCR. List of TaqMan probes used for quantitative miRNAs analysis.**
